# Supplementary material for: Telecoupled urban demand from West African cities causes social-ecological land use transformation in Saharan oases
Source: PubMed Central journal article supplement (PMC10490980; doi:10.1371/journal.pone.0289694), 2023-09-08
Supplement: pone.0289694.s003.pdf [file pone.0289694.s003.pdf]

## Survey questions for Emalawlé and Aoukadédé, Mont Bagzam, Niger

1. Household (socio-economic)
2. Agricultural workforce
3. Crop/livestock land use
4. Crop production
5. Crop marketing
6. Migration

*Household ID:*

### 1. Household (socio-economic)

#### 1.1 Person Record

| Number | Age | Gender | Marital status | Education | Occupation | Residency | Participation in farm work (Y/N) | Hours/Week |
|--------|-----|--------|----------------|-----------|------------|-----------|----------------------------------|------------|
|        |     |        |                |           |            |           |                                  |            |
|        |     |        |                |           |            |           |                                  |            |

#### 1.2 Household Record

Q: What is the total household income?

Q: What is the share of income from agriculture (marketing) CROP?

Q: What is the share of income from agriculture (marketing) LIVESTOCK?

Q: What is the share of income from off-farm activities?

Q: What are the off-farm activities and since when are they practiced?

### 2. Agricultural Workforce

Q: How much time do you spend for the care of your crops (h/day)?

Q: How much time do you spend for the care of your livestock (h/day)?

Q: Do you use hired labor (Y/N)?

*If YES:*

| Persons | From where? | Payment (per day) |
|---------|-------------|-------------------|
|         |             |                   |
|         |             |                   |

Q: Do you want to continue farming in the future (Y/N)?

*If YES, why?*

*If NO, why not?*

Q: Do you want your children to become a farmer (Y/N)?

*If YES, why?*

*If NO, why not?*

### 3. Crop/Livestock land use

Q: How much land do you own?

Q: Where is your land (show on the map/No. of plots)?

Q: How much land do you use for CROP cultivation?

Q: Has your cropping land increased/decreased in the past 3/5/10/20 years?

| Time span | Change of crop land size (+/0/-) | What is the reason for change in crop land size? (Environmental conditions/Buildings for own use/Livestock farming/ Higher sales/Other) |
|-----------|----------------------------------|-----------------------------------------------------------------------------------------------------------------------------------------|
| 3         |                                  |                                                                                                                                         |
| 5         |                                  |                                                                                                                                         |
| 10        |                                  |                                                                                                                                         |
| 20        |                                  |                                                                                                                                         |

Q: How much land do you use for grazing?

Q: How much of your grazing land do you use for fodder production?

Q: How much FALLOW LAND do you have?

Q: Has this uncultivated area size changed over time?

| Time span | Change (+/0/-) | Reason |
|-----------|----------------|--------|
| 3         |                |        |
| 5         |                |        |
| 10        |                |        |
| 20        |                |        |

Q: Do you rent additional plots (Y/N)?

*If YES:*

| How much? | From whom?    | Reason |
|-----------|---------------|--------|
|           | Neighbor      |        |
|           | Communal Land |        |
|           | Relatives     |        |
|           | Other         |        |

Q: Do you rent out plots (Y/N)?

*If YES:*

| How much? | To whom?      | Reason |
|-----------|---------------|--------|
|           | Neighbor      |        |
|           | Communal Land |        |
|           | Relatives     |        |
|           | Other         |        |

### 4. Crop production

#### 4.1 Variety

Q: Which crops do you cultivate? How did they change over time?

| Species | Plots | Yield | Season (crop rotation) | % sold | % own consumption | Change in the past 1/3/5/10 years (increase/decrease/no change) | Reason for cultivation (HH consumption/Marketing/Fodder/Storage ability) |
|---------|-------|-------|------------------------|--------|-------------------|-----------------------------------------------------------------|--------------------------------------------------------------------------|
|         |       |       |                        |        |                   |                                                                 |                                                                          |
|         |       |       |                        |        |                   |                                                                 |                                                                          |

Q: Which crops are most important for you?

|              |
|--------------|
| Crop species |
| 1.           |
| 2.           |
| 3.           |

Q: Where do you get seeds from? / Do you (re-)grow your own seeds?

| Crop | Origin |
|------|--------|
|      |        |
|      |        |

Q: What are the main problems with crop cultivation?

| Time   | Problem 1 | Problem 2 | Problem 3 |
|--------|-----------|-----------|-----------|
| Past   |           |           |           |
| Today  |           |           |           |
| Future |           |           |           |

#### 4.2 Intensity/Input

Q: Do you use manure/compost on your fields (Y/N)?

*If YES, for which crops?*

|                               |  |
|-------------------------------|--|
| Quantity per unit area / plot |  |
| From which animals?           |  |
| % own production              |  |
| % bought                      |  |

Q: Do you use mineral fertilizer (Y/N)?

*If YES, for which crops and on which plots?*

|                                 |  |
|---------------------------------|--|
| What kind of fertilizer?        |  |
| Quantity? (total per unit area) |  |
| When do you apply it?           |  |
| Price per unit                  |  |

Q: Do you irrigate your fields?

*If YES:*

|                                                                  |                         |
|------------------------------------------------------------------|-------------------------|
| What is your source of water?                                    |                         |
| How many days per week do you irrigate your fields?              |                         |
| Which technique? (drip/flood/canals)                             |                         |
| Do you have to pay for the water?                                |                         |
| Has your source of water changed within the last 10 years (Y/N)? | Yes                  No |
| If YES: From to?                                                 |                         |

## 5. Crop marketing

Q: Which crops and processed products do you sell?

| Crop | Product | Where do you sell? | Distance from the farm? | To whom? (locals, cooperative, wholesaler) | Unit of sale | Price per unit | Selling season | Units sold per year/season |
|------|---------|--------------------|-------------------------|--------------------------------------------|--------------|----------------|----------------|----------------------------|
|      |         |                    |                         |                                            |              |                |                |                            |
|      |         |                    |                         |                                            |              |                |                |                            |

Q: Do you sell more or less than 1, 3, 5, 10 years ago?

| Crop/Product | 1 year | 3 years | 5 years | 10 years | Reason |
|--------------|--------|---------|---------|----------|--------|
|              |        |         |         |          |        |
|              |        |         |         |          |        |

Q: Has your marketing changed over time (Y/N)?

*If YES, in which way?*

Q: Do you have problems with marketing (Y/N)?

*If YES, which difficulties do you have? (market access, seasonality, work force)*

## 8. Migration

Q: Do you or your relatives migrate seasonally to other cities/states for employment?

If YES:

| Who? | Destination | Time frame | Reason |
|------|-------------|------------|--------|
|      |             |            |        |
|      |             |            |        |

Q: Did you or your relatives migrate seasonally to other cities/states for employment in the past (before Gaddafi's death)?

If YES:

| Who? | Destination | Time frame | Reason |
|------|-------------|------------|--------|
|      |             |            |        |
|      |             |            |        |

Q: Do you or your relatives practice caravan trade for salt?

If YES:

| Who? | Destination | Times per year | Reason |
|------|-------------|----------------|--------|
|      |             |                |        |
|      |             |                |        |

**Thank you for your participation!**
